# Supplementary material for: Effects of deposited ions on the photocatalytic activity of TiO2–Au nanospheres
Source: Royal Society of Chemistry journal article supplement (doi:10.1039/c4ra10192h), 2014-10-27
Supplement: c4ra10192h1.pdf [file c4ra10192h1.pdf]

# *Supporting Information*

## **Effects of Deposited Ions on the Photocatalytic Activity of TiO<sub>2</sub>-Au Nanospheres**

*Rini Ravindranath<sup>ab</sup>, Prathik Roy<sup>a</sup>, Arun Prakash Periasamy<sup>a</sup>, and Huan-Tsung Chang<sup>a,\*</sup>*

*<sup>a</sup>Department of Chemistry, National Taiwan University, 1, Section 4, Roosevelt Road, Taipei 106,  
Taiwan*

*<sup>b</sup>Nanoscience and Technology Program, Taiwan International Graduate Program, Academia Sinica  
and National Taiwan University.*

Correspondence: Professor Huan-Tsung Chang, Department of Chemistry, National Taiwan University, 1, Section 4, Roosevelt Road, Taipei 106, Taiwan.

Tel. and fax: 011-886-2-33661171

E-mail: changht@ntu.edu.tw

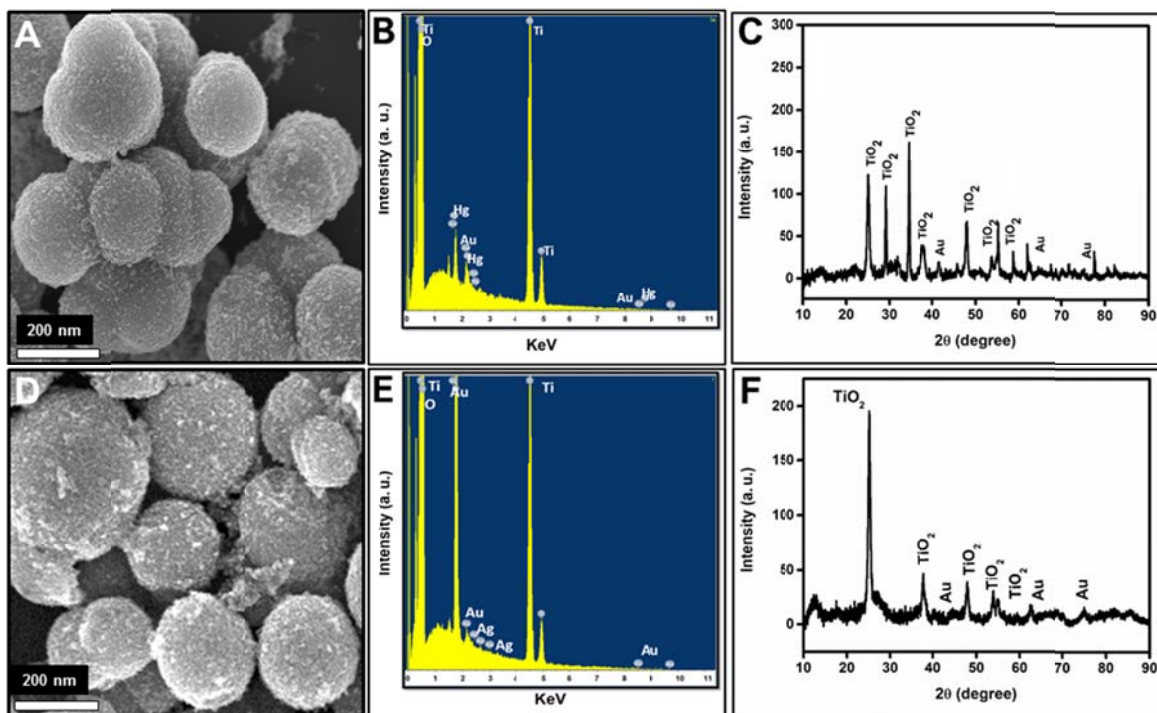

**Figure S1.** (A) SEM image (B) EDX and (C) XRD pattern of TiO<sub>2</sub>-Au/Hg NSs; (D) SEM image, (E) EDX and (F) XRD pattern of TiO<sub>2</sub>-Au/Ag NSs.

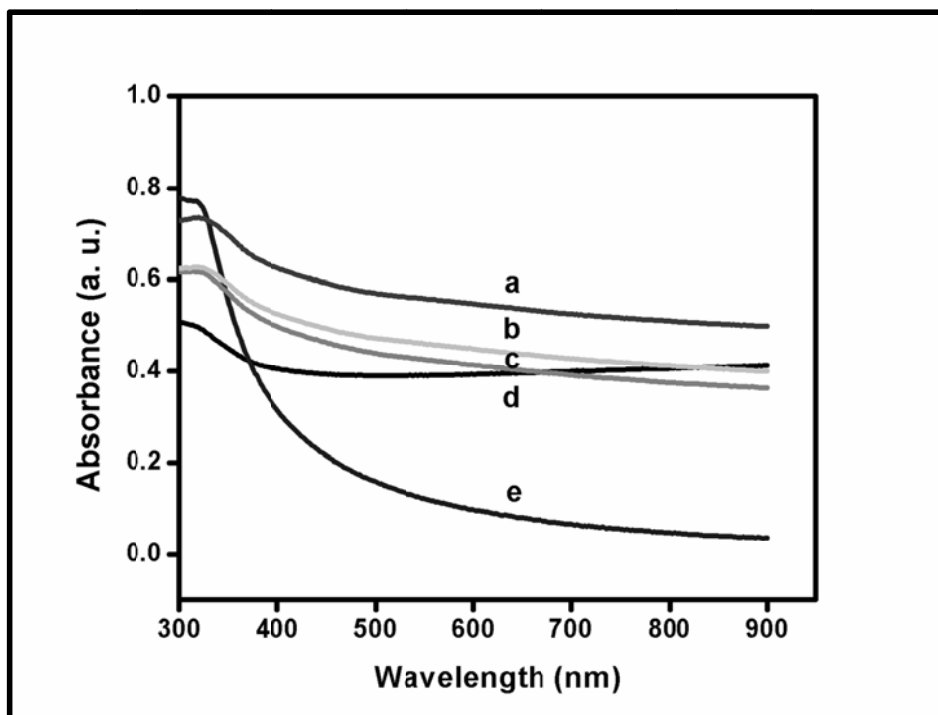

**Figure S2.** UV-Vis absorption spectra of (a)  $\text{TiO}_2$ - Au NSs, (b)  $\text{TiO}_2$ -Au/Ag NSs, (c)  $\text{TiO}_2$ -Au/Hg NSs, (d)  $\text{TiO}_2$  NSs and (e) P25.

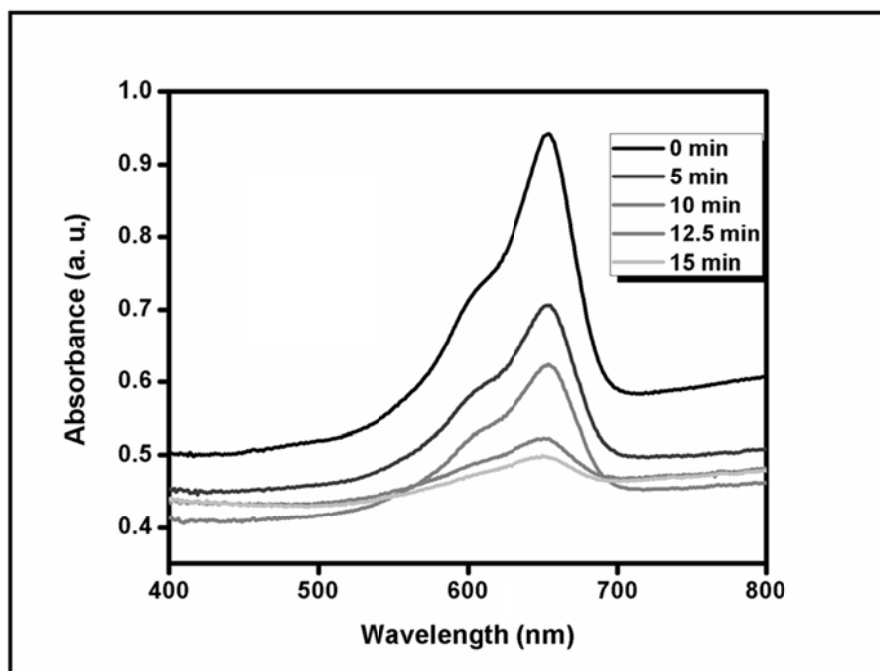

**Figure S3.** UV-Vis absorption spectra of MB (10  $\mu\text{M}$ ) that had been subjected to photocatalytic degradation for various times using  $\text{TiO}_2\text{-Au}$  NSs (final concentration: 10  $\text{mg mL}^{-1}$ ).

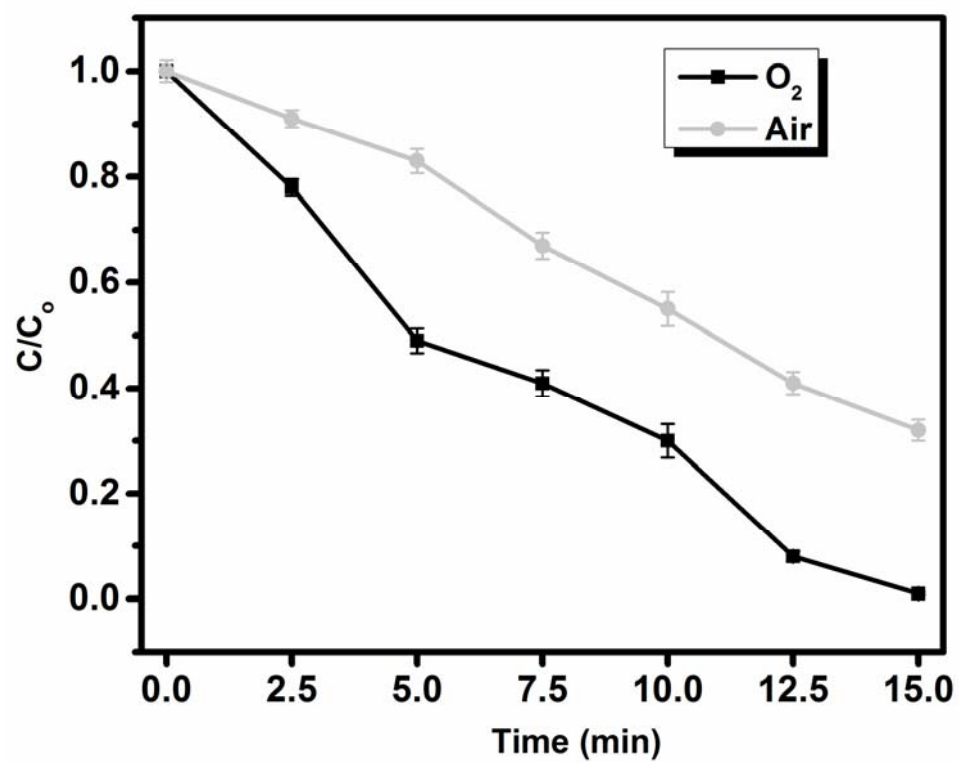

**Figure S4.** Effect of oxygen on the photocatalytic degradation of MB (10  $\mu$ M) using  $TiO_2$ -Au NSs (final concentration: 10 mg  $mL^{-1}$ ). Other conditions are the same as that in Figure 3.

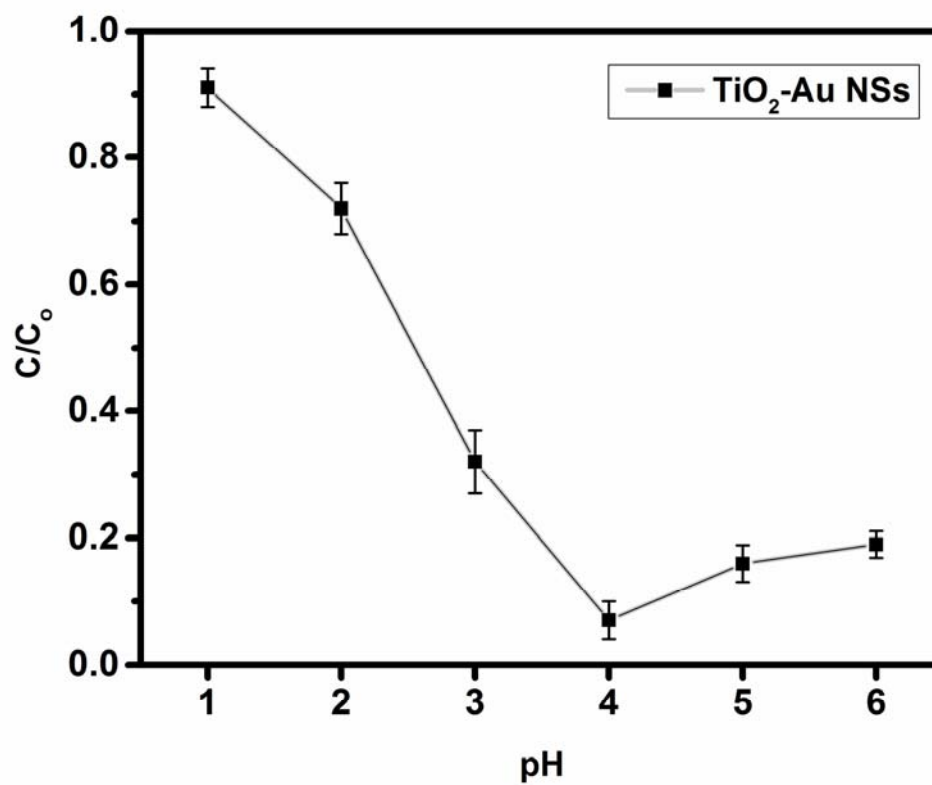

**Figure S5.** Effect of pH on the reduction of  $\text{Cr}^{6+}$  ( $34\ \mu\text{M}$ ) by  $\text{TiO}_2\text{-Au NSs}$  (final concentration:  $10\ \text{mg mL}^{-1}$ ). Buffer:  $10\ \text{mM}$  acetate solution. Other conditions are the same as that in Figure 4.

**Table 1:** Usability of TiO<sub>2</sub>-Au, TiO<sub>2</sub>-Au/Hg and TiO<sub>2</sub>-Au/Ag NSs as photocatalysts

| Cycles | MB                       |                             |                             | Cr <sup>6+</sup>         |
|--------|--------------------------|-----------------------------|-----------------------------|--------------------------|
|        | TiO <sub>2</sub> -Au NSs | TiO <sub>2</sub> -Au NSs/Hg | TiO <sub>2</sub> -Au NSs/Ag | TiO <sub>2</sub> -Au NSs |
|        | (%)                      | (%)                         | (%)                         | (%)                      |
| 1      | 100                      | 100                         | 100                         | 100                      |
| 2      | 99                       | 97                          | 97                          | 99                       |
| 3      | 97                       | 96                          | 96                          | 99                       |
| 4      | 96                       | 94                          | 94                          | 98                       |
| 5      | 92                       | 93                          | 93                          | 97                       |

The efficiency in each case is set at 100% for the first cycle.
